# Supplementary material for: Schiff Bases Functionalized With T-Butyl Groups As Adequate Ligands to Extended Assembly of Cu(II) Helicates
Source: Preprints.org preprint supplement (doi:10.20944/preprints202304.1135.v1), 2023-04-28
Supplement: Supplementary file 3 [file supplementary]

Supporting Information

Schiff bases functionalized with t-butyl groups as adequate ligands to extended assembly of Cu(II) helicates

Sandra Fernández-Fariña,1,* Isabel Velo-Heleno,1 Miguel Martínez-Calvo,1 Marcelino Maneiro,2 Francisco Rivadulla,3 Rosa Pedrido1,* andAna M. González-Noya1

| **Citation:** To be added by editorial staff during production.  Academic Editor: Firstname Lastname  Received: date  Accepted: date  Published: date  **Publisher’s Note:** MDPI stays neutral with regard to jurisdictional claims in published maps and institutional affiliations.  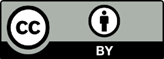  **Copyright:** © 2022 by the authors. Submitted for possible open access publication under the terms and conditions of the Creative Commons Attribution (CC BY) license (https://creativecommons.org/licenses/by/4.0/). |
| --- |

1. Departamento de Química Inorgánica, Facultade de Química, Campus Vida, Universidade de Santiago de Compostela, 15782 Santiago de Compostela, Spain
2. Departamento de Química Inorgánica, Facultade de Ciencias, Universidade de Santiago de Compostela, 27002 Lugo, Spain
3. CIQUS, Centro Singular de Investigación en Química Biolóxica e Materiais Moleculares, Departamento de Química-Física, Universidade de Santiago de Compostela, 15782-Santiago de Compostela, Spain

***** Correspondence: sandra.fernandez.farina@usc.es (S.F.-F), rosa.pedrido@usc.es (R.P.)

1. Schiff base ligands H2L1 and H2L2

Figure S1. 1H NMR spectra of H2L1 (400 MHz, acetone-d6, r.t., δ (m, nH, Hx, J)): 12.98 (s, 2H, H1), 8.92 (s, 2H, H2), 7.91 (d, J= 2.5 Hz, 2H, H3); 7.47 (dd, J= 8.7, 2.5 Hz, 2H, H4), 7.37 (s, 8H, H5+H6); 6.89 (d, J= 8.7 Hz, 2H, H7); 4.08 (s, 2H, H8), 1.32 (s, 18H, H9).

Figure S2. 1H NMR spectra of H2L2 (400 MHz, acetone-d6, r.t., δ (m, nH, Hx, J)): 14.01 (s, 2H, H1), 8.90 (s, 2H, H2), 7.44-7.37 (m, 12H, H3-H6); 6.89 (t, J= 7 Hz, 2H, H7); 4.09 (s, 2H, H8), 1.44 (s, 18H, H9).

1. Copper(II) helicates derived from Schiff base ligands

Figure S3. Infrared spectra superposition of H2L1 (pink) and [Cu2(L1)2] (blue).

Figure S4. Intermolecular CH···π interactions in the crystal lattice of the [Cu2(L1)2]·4CH3CN helicate.

Figure S5. Intermolecular π ···π interactions in the crystal lattice of the [Cu2(L2)2]·CH3CN helicate.

Table S1. Main crystallographic data for helicates [Cu2(L1)2]·4CH3CN and [Cu2(L2)2]·CH3CN.

|  | [Cu2(L1)2]·4CH3CN | [Cu2(L2)2]·CH3CN |
| --- | --- | --- |
| Molecular formula | C72H75N5O4Cu2 | C72H75N5O4Cu2 |
| Molecular weight | 1329.11 | 1201.45 |
| Spatial group | *I2/a* | *P* |
| Crystalline system | Monoclinic | Triclinic |
| Crystal size/mm | 0.20 × 0.19 × 0.07 | 0.05 × 0.04 × 0.02 |
| a/Å | 18.7980(5) | 11.4703(5) |
| b/Å | 17.0029(5) | 13.3929(5) |
| c/Å | 23.3318(9) | 20.4608(7) |
| /º | 90 | 95.462(3) |
| /º | 109.65 (10) | 101.556(3) |
| /º | 90 | 100.206(3) |
| Temperature/K | 100 | 100 |
| Volume/Å3 | 7023.0 (4) | 2667.0(2) |
| Z | 4 | 2 |
| Measured reflexions | 45292 | 41389 |
| Unique reflexions [Rint] | 7172 [0.044] | 10230 [0.159] |
| /mm1 | 0.661 | 1.300 |
| Residues/e Å3 | 2.11 and -0.53 | 0.35 and -0.79 |
| R | 0.065 | 0.068 |
| *w*R | 0.109 | 0.187 |

Table S2. Main bond distances and angles for [Cu2(L1)2]·4CH3CN helicate.

| Bond distances (Å) | | | | | |
| --- | --- | --- | --- | --- | --- |
| N1—Cu1 | 1.967 (2) | O1—Cu1 | 1.8935 (18) | N1—Cu1 | 1.967 (2) |
| N2—Cu1i | 1.962 (2) | O2—Cu1i | 1.8907(17) | N2—Cu1i | 1.962 (2) |
| Bond angles (⁰) | | | | | |
| O1—Cu1—O2i | 92.07(8) | O2—Cu1i—N1i | 142.00(9) | O1—Cu1—O2i | 92.07(8) |
| O2i—Cu1—N2i | 94.90(8) | O1i—Cu1i—N1i | 94.89(8) | O2i—Cu1—N2i | 94.90(8) |
| O1—Cu1—N2i | 144.84(9) | N2—Cu1i—N1i | 100.41(8) | O1—Cu1—N2i | 144.84(9) |

Table S3. Main bond distances and angles for [Cu2(L2)2]·CH3CN helicate.

| Bond distances (Å) | | | | | |
| --- | --- | --- | --- | --- | --- |
| N1—Cu1 | 1.963 (5) | O1—Cu1 | 1.885 (4) | N1—Cu1 | 1.963 (5) |
| N2—Cu2 | 1.943 (4) | O2—Cu2 | 1.903 (4) | N2—Cu2 | 1.943 (4) |
| N3—Cu2 | 1.973 (5) | O3—Cu2 | 1.875 (4) | N3—Cu2 | 1.973 (5) |
| N4—Cu1 | 1.942 (5) | O4—Cu1 | 1.895 (3) | N4—Cu1 | 1.942 (5) |
| Bond angles (⁰) | | | | | |
| O4—Cu1—O1 | 95.32 (16) | O2—Cu2—O3 | 92.28 (16) | O4—Cu1—O1 | 95.32 (16) |
| O4—Cu1—N1 | 139.98 (18) | O2—Cu2—N3 | 147.87 (18) | O4—Cu1—N1 | 139.98 (18) |
| O1—Cu1—N1 | 93.02 (18) | O3—Cu2—N3 | 94.45 (18) | O1—Cu1—N1 | 93.02 (18) |
| O4—Cu1—N4 | 94.07 (17) | O2—Cu2—N2 | 92.71 (18) | O4—Cu1—N4 | 94.07 (17) |
| O1—Cu1—N4 | 146.43 (19) | O3—Cu2—N2 | 150.31 (19) | O1—Cu1—N4 | 146.43 (19) |
| N1—Cu1—N4 | 100.18 (19) | N3—Cu2—N2 | 96.72 (19) | N1—Cu1—N4 | 100.18 (19) |
| O4—Cu1—O1 | 95.32 (16) | O2—Cu2—O3 | 92.28 (16) | O4—Cu1—O1 | 95.32 (16) |
| O4—Cu1—O1 | 95.32 (16) | O2—Cu2—O3 | 92.28 (16) | O4—Cu1—O1 | 95.32 (16) |
